# Supplementary figures and images for: Programmable large area digital microfluidic array with integrated droplet sensing for bioassays
Source: Royal Society of Chemistry journal article supplement (doi:10.1039/c2lc40273d), 2012-01-01

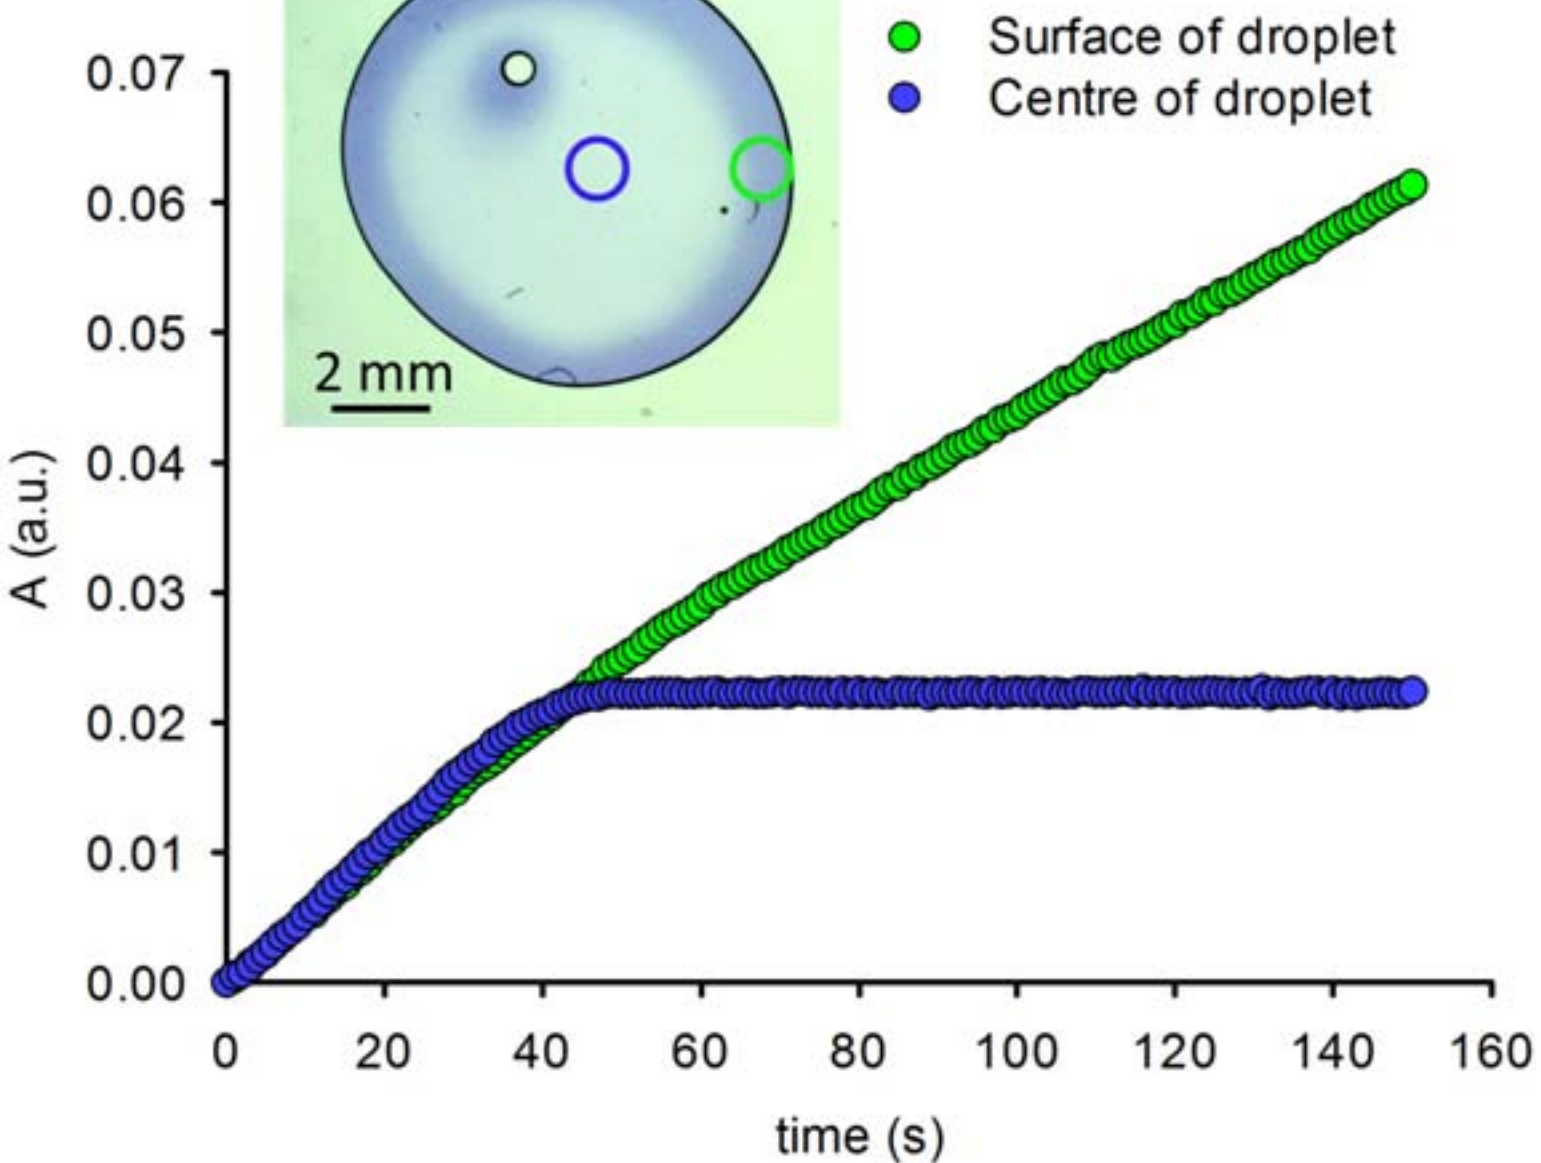

Supplement: c2lc40273d_2.pdf [file c2lc40273d_2.pdf]

A

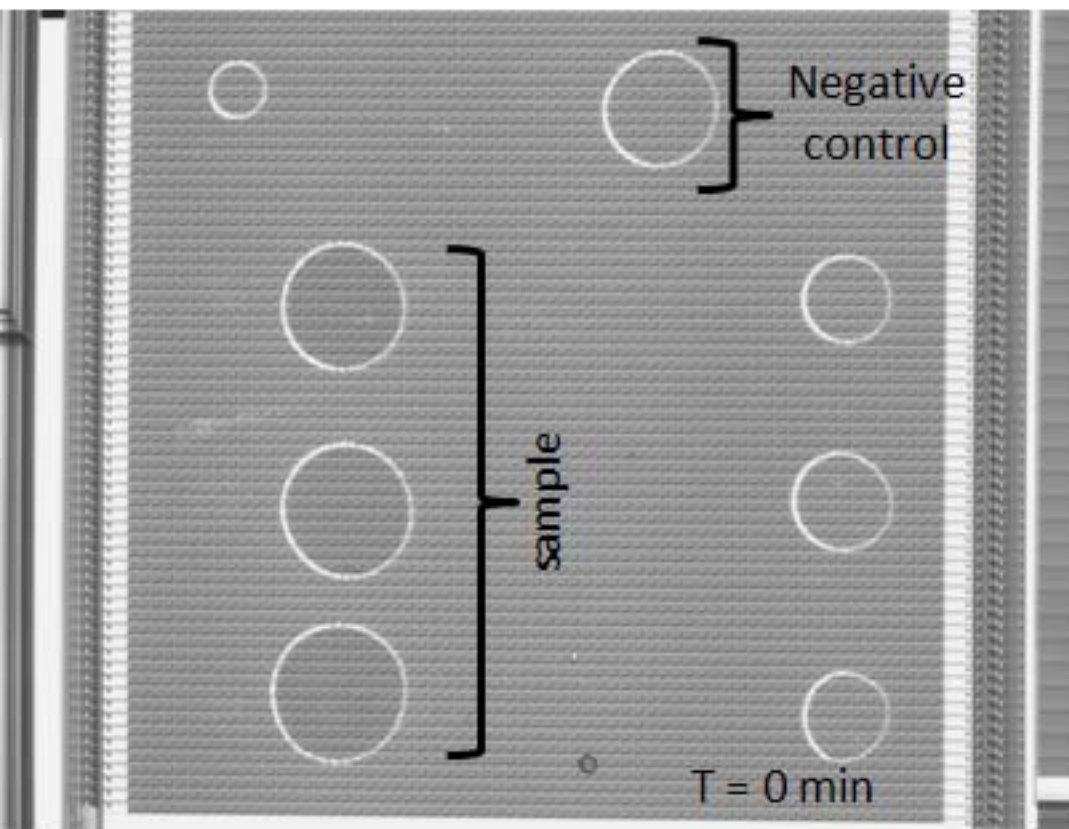

B

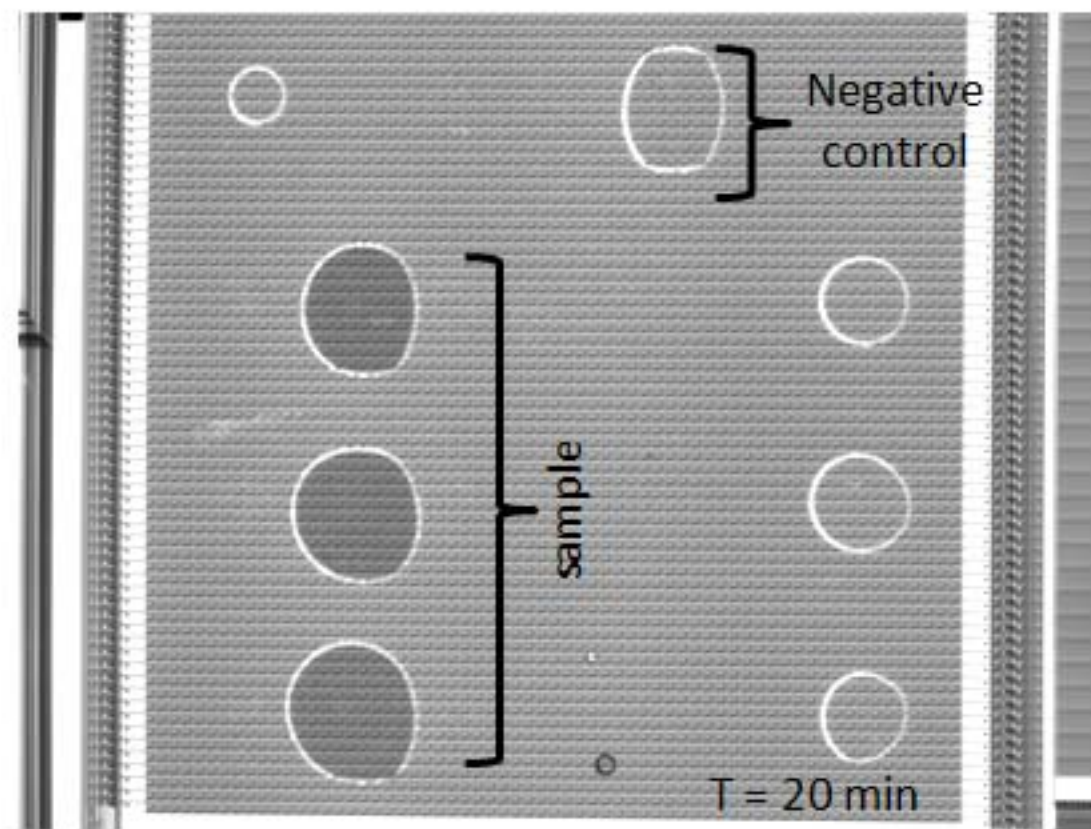

Supplement: c2lc40273d_5.pdf [file c2lc40273d_5.pdf]
